# Supplementary material for: Effects of Dufulin on Oxidative Stress and Metabolomic Profile of Tubifex
Source: MDPI journal article supplement (doi:10.3390/metabo11060381), 2021-06-11
Supplement: s1 [file s1]

# Effects of Dufulin on Oxidative Stress and Metabolomic Profile of Tubifex

Yile Yu<sup>1</sup>, Yuxin Zhu<sup>1</sup>, Jing Yang<sup>1</sup>, Wentao Zhu<sup>1</sup>, Zhiqiang Zhou<sup>1</sup>, Renke Zhang<sup>1,\*</sup>

## Supplementary Materials

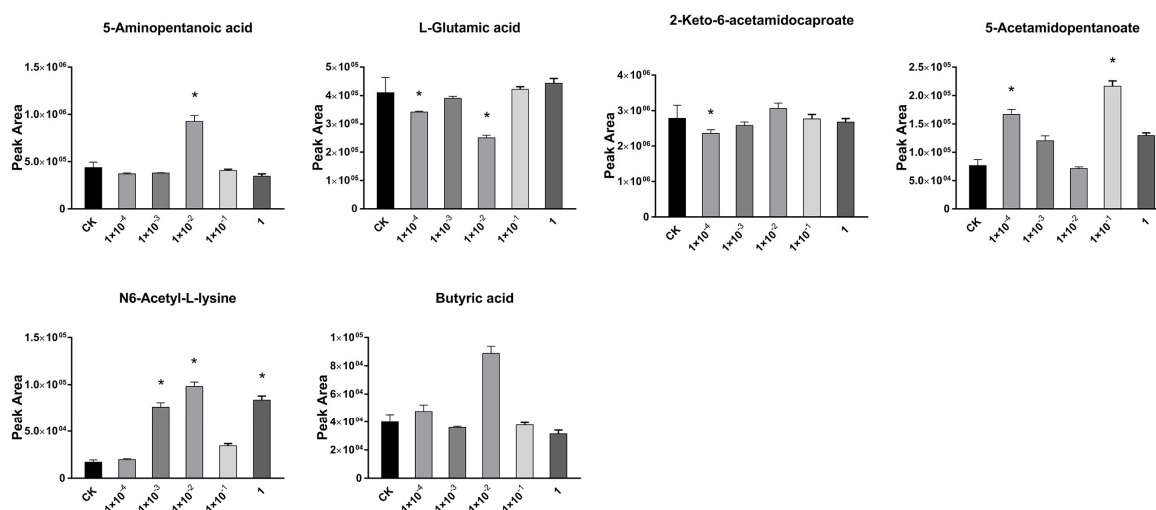

**Figure S1.** Changes in the concentration of metabolites of butanoate metabolism in Tubifex exposed to Dufulin. Error bars indicate standard deviation (SD). (\*:  $p < 0.05$ ).

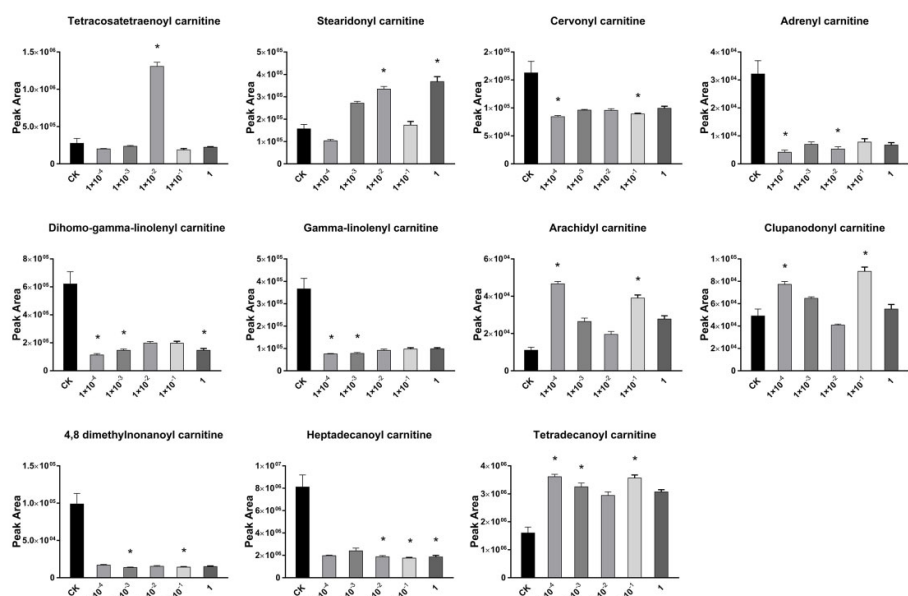

**Figure S2.** Changes in the concentration of metabolites of carnitine shuttle in *Tubifex* exposed to Dufulin. Error bars indicate standard deviation (SD). (\*:  $p < 0.05$ ).
